# Supplementary material
Source: Springer Nature journal article supplement (https://www.springermedizin.de/resource/supplementary/12963_2012_222_MOESM2_ESM.pdf/9572380)

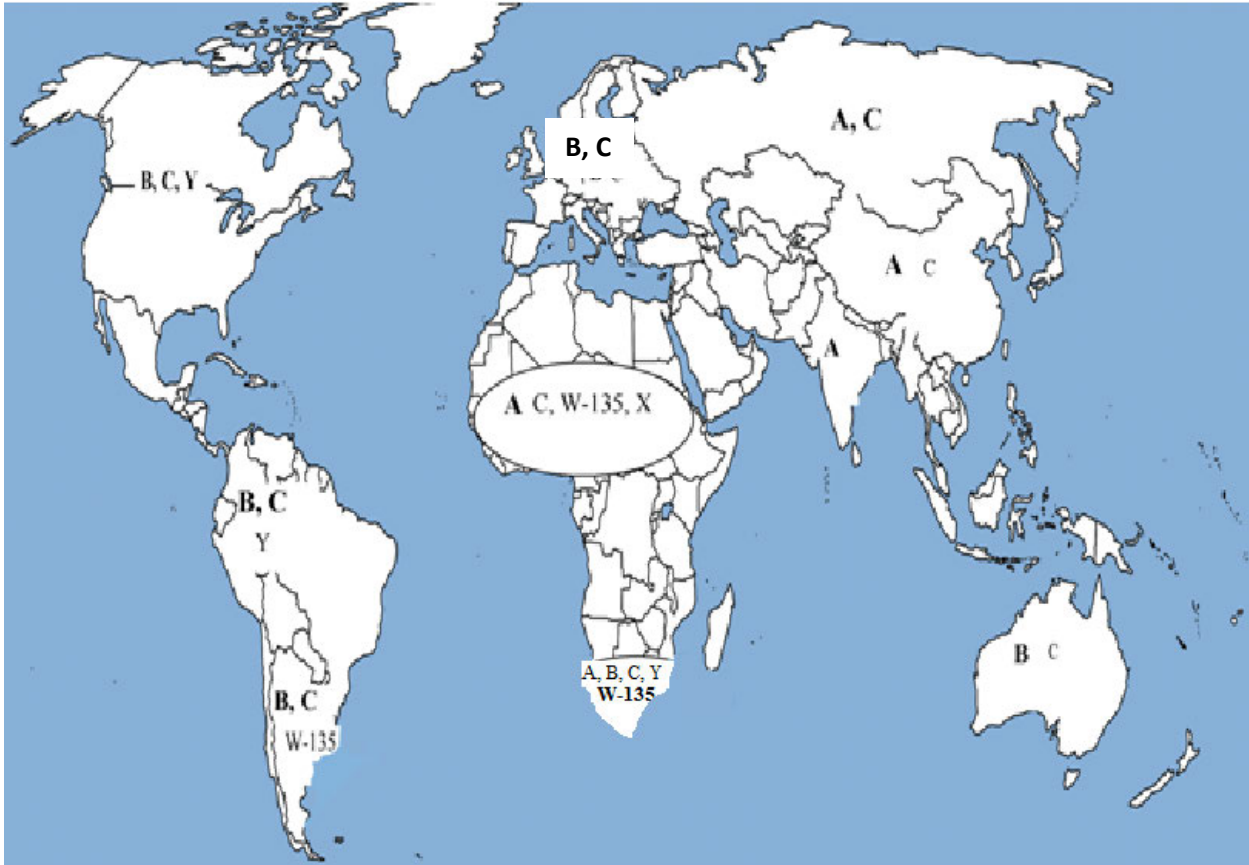

Supplement: MOESM2 [file 9572380]
